# Supplementary material for: Vitrification of Rhesus Macaque Mesenchymal Stem Cells and the Effects on Global Gene Expression
Source: Hindawi journal article supplement (doi:10.1155/2017/3893691), 2017-01-01
Supplement: f1 [file 3893691.f1.pdf]

## Supplementary materials

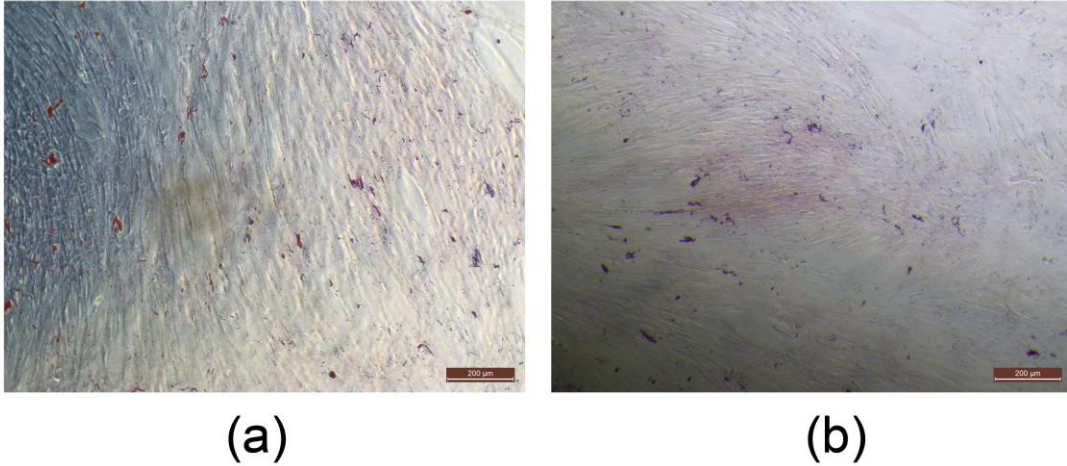

Figure S1. The MSCs vitrified with DMSO (a) and EG (b) were cultured in DMEM medium supplemented with 10% FBS for 7 days without differentiation induction as negative controls. No adipogenic differentiation was observed evaluated with oil red staining.
